# Supplementary material for: Modulating Cholinergic Hyperactivity Restores Motor Deficits in Parkinson's Disease, Revealed by Quantitative [18F]VAT PET Imaging Vesicular Acetylcholine Transporter
Source: Research Square preprint supplement (doi:10.21203/rs.3.rs-7424059/v1), 2025-09-11
Supplement: Supplementary file 1 [file c7d34333b8059f63f7f08793.docx]

Supplementary Material

**Modulating Cholinergic Hyperactivity Restores Motor Deficits in Parkinson's Disease, Revealed by Quantitative [18F]VAT PET Imaging Vesicular Acetylcholine Transporter**

Peizhen Ye1, Lei Bi1, Yifan Qiu1, Min Yang1, Guolong Huang1, Yongshan Liu1, Yuyi Hou1, Pengcheng Zheng1, Sirui Wu1 and Hongjun Jin1*

1Guangdong Provincial Engineering Research Center of Molecular Imaging, The Fifth Affiliated Hospital, Sun Yat-sen University, Zhuhai City, Guangdong Province 519000, China

*Corresponding author:

Hongjun Jin, PhD, Guangdong Provincial Engineering Research Center of Molecular Imaging, Fifth Affiliated Hospital, Sun Yat-sen University, 52 E. Meihua Road, Zhuhai City, Guangdong Province 519000, China; Tel: +86 (756) 252-6136; Email: jinhj3@mail.sysu.edu.cn

**Keywords:** Parkinson's disease, VAChT, Cholinergic neuron, Neuroimaging.

**Table S1. Number of mice involved in each experiment.**

| Experiment | Group | | | |
| --- | --- | --- | --- | --- |
| A53T | A53T/MK | WT | WT/MK |
| Grip tests | 6 | 6 | 6 | 6 |
| Pole tests | 6 | 6 | 6 | 6 |
| Inverted screen tests | 6 | 6 | 6 | 6 |
| [18F]VAT PET-MRI | 6 | 6 | 6 | 6 |
| [18F]L-DOPA PET-MRI | 4 | 4 | 3 | 4 |
| Autoradiography | 2 | 2 | 2 | 2 |
| Immunostaining | 2 | 2 | 2 | 2 |
| Correlation analysis between behavior tests and [18F]VAT | 6 | 6 | 6 | 6 |
| Correlation analysis between behavior tests and [18F]L-DOPA | 4 | 4 | 3 | 4 |

**Table S2.** **Summary of the types of equipment and software.**

| Equipment and software | Brand | Detail |
| --- | --- | --- |
| High-performance liquid chromatography | Elite | 65% H2O（0.1% TFA）and 35% acetonitrile  Flow rates:  Semi-preparation: 4ml/min Quality control: 1ml/min Co-injection: 1ml/min |
| Fourier Rebinning using InterView FUSION software | Mediso | 3s ×10; 10s × 3; 60s × 4; 150s × 10; |
| Electronic grip strength meter | Huayonbio Co Ltd | Default settings and parameters |
| Beaver micropattern gas detector system | Ai4R Inc | Default settings and parameters |
| BeaQuant software 3.3 | Ai4R Inc | Default settings and parameters |
| 9.4T micro MRI scanner | Bruker | Repetition time (TR) = 6200 ms; Echo time (TE) = 22.5 ms; Slice thickness = 0.3 mm; Averages = 5; Scan time = 9 m 18 s; Number of slices = 55; Field of view = 15×15; Image size = 150×150. |
| PMOD software | PMOD Technologies LLC | Rodent brain tool |
| Carimas 2.10 | Turku PET Center | Default settings and parameters |
| ImageJ | National Institutes of Health | 1.53k version |
| Axio observer 7 microscope | ZEISS | Default settings and parameters |
| GraphPad Prism 8 | GraphPad Software | Two-way ANOVA, Three-way ANOVA, Correlation analysis, and Simple linear regression |

**Table S3. Summary** **of the reagents and antibodies.**

| Reagents and Antibodies | Product number | Brand |
| --- | --- | --- |
| Montelukast | M918792 | Macklin |
| Benserazide | B801922 | Macklin |
| Entacapone | 134750 | BIOBERRY |
| Tissue-Tek® O.C.T. Compound | 4583 | Sakura |
| BSA | A1933 | Sigma‒Aldrich |
| Primary antibody against VAChT | SAB5200251 | Sigma‒Aldrich |
| Primary antibody against TH | AB9702 | Merck |
| Primary antibody against CysLTR1 | DF4865 | Affinity |
| DAPI | D1306 | ThermoFisher |

**Table S4. Quantification and adjusted *p* value of [18F]VAT PET at baseline.** Data is shown as mean ± SD. Unparied t-tests were performed. **p* < 0.05, ***p* < 0.01, and ****p* < 0.001 were considered significantly different.

| Brain regions | Mean ± SD | | p value |
| --- | --- | --- | --- |
| A53T (n=12) | WT (n=12) |
| Cortex | 1.012 ± 0.092 | 0.967 ± 0.072 | 0.2029 |
| Striatum | 1.272 ± 0.096 | 1.131 ± 0.130 | 0.0065** |
| Basal forebrain septum | 1.168 ± 0.118 | 1.075 ± 0.064 | 0.0247* |
| Thalamus | 1.089 ± 0.058 | 1.013 ± 0.097 | 0.0295* |
| Hypothalamus | 1.052 ± 0.093 | 1.041 ± 0.107 | 0.7918 |
| Amygdala | 1.036 ± 0.081 | 1.003 ± 0.077 | 0.3083 |
| Hippocampus | 1.081 ± 0.060 | 0.971 ± 0.058 | 0.0001*** |
| Superior colliculi | 1.080 ± 0.083 | 0.963 ± 0.106 | 0.0064** |
| Midbrain | 1.129 ± 0.070 | 1.051 ± 0.089 | 0.0257* |
| Central Gray | 1.122 ± 0.124 | 1.017 ± 0.094 | 0.0283* |
| Inferior colliculi | 1.057 ± 0.080 | 0.976 ± 0.080 | 0.0211* |
| Brainstem | 1.081 ± 0.059 | 1.079 ± 0.087 | 0.9447 |

**Table S5. Quantification and adjusted *p* value of [18F]VAT autoradiography.** Ten ROIs were outlined in each brain region. Data is shown as mean ± SD. Technical replicates were made statistically. Two-way ANOVA and Tukey's multiple comparisons test were performed. ***p* < 0.01, ****p* < 0.001, and *****p* < 0.0001 were considered significantly different.

| Brain regions | Radioactivity (Mean ± SD) | | | | Adjusted p value | |
| --- | --- | --- | --- | --- | --- | --- |
| A53T | A53T/MK | WT | WT/MK | A53T vs. A53T/MK | A53T vs.  WT |
| Cortex | 9.445 ± 0.683 | 9.078 ± 1.214 | 7.958 ± 1.307 | 8.093 ± 1.613 | 0.8524 | 0.0100* |
| Striatum | 13.607 ± 0.808 | 12.412 ± 0.763 | 10.850 ± 0.843 | 11.292 ± 0.971 | 0.0059** | <0.0001**** |
| Basal forebrain septum | 9.168 ± 1.262 | 7.830 ± 1.413 | 7.034 ± 0.967 | 7.438 ± 1.500 | 0.0045** | <0.0001**** |
| Thalamus | 7.828 ± 0.807 | 6.877 ± 0.553 | 6.455 ± 0.597 | 6.776 ± 0.676 | 0.0287* | 0.0004*** |
| Hypothalamus | 6.681 ± 1.019 | 5.933 ± 0.548 | 5.704 ± 0.566 | 5.666 ± 0.585 | 0.0032** | <0.0001**** |
| Hippocampus | 9.220 ± 0.790 | 7.922 ± 1.062 | 7.336 ± 1.163 | 7.348 ± 0.950 | 0.0009*** | <0.0001**** |
| Midbrain | 8.444 ± 0.569 | 6.760 ± 0.995 | 6.726 ± 0.703 | 6.523 ± 0.981 | 0.0008*** | 0.0007*** |
| Cerebrallum | 4.245 ± 0.764 | 3.997 ± 0.358 | 4.077 ± 0.408 | 4.101 ± 0.601 | 0.5652 | 0.7657 |
| Brainstem | 4.532 ± 0.580 | 4.209 ± 0.530 | 4.457 ± 0.526 | 4.773 ± 0.437 | 0.2095 | 0.9722 |


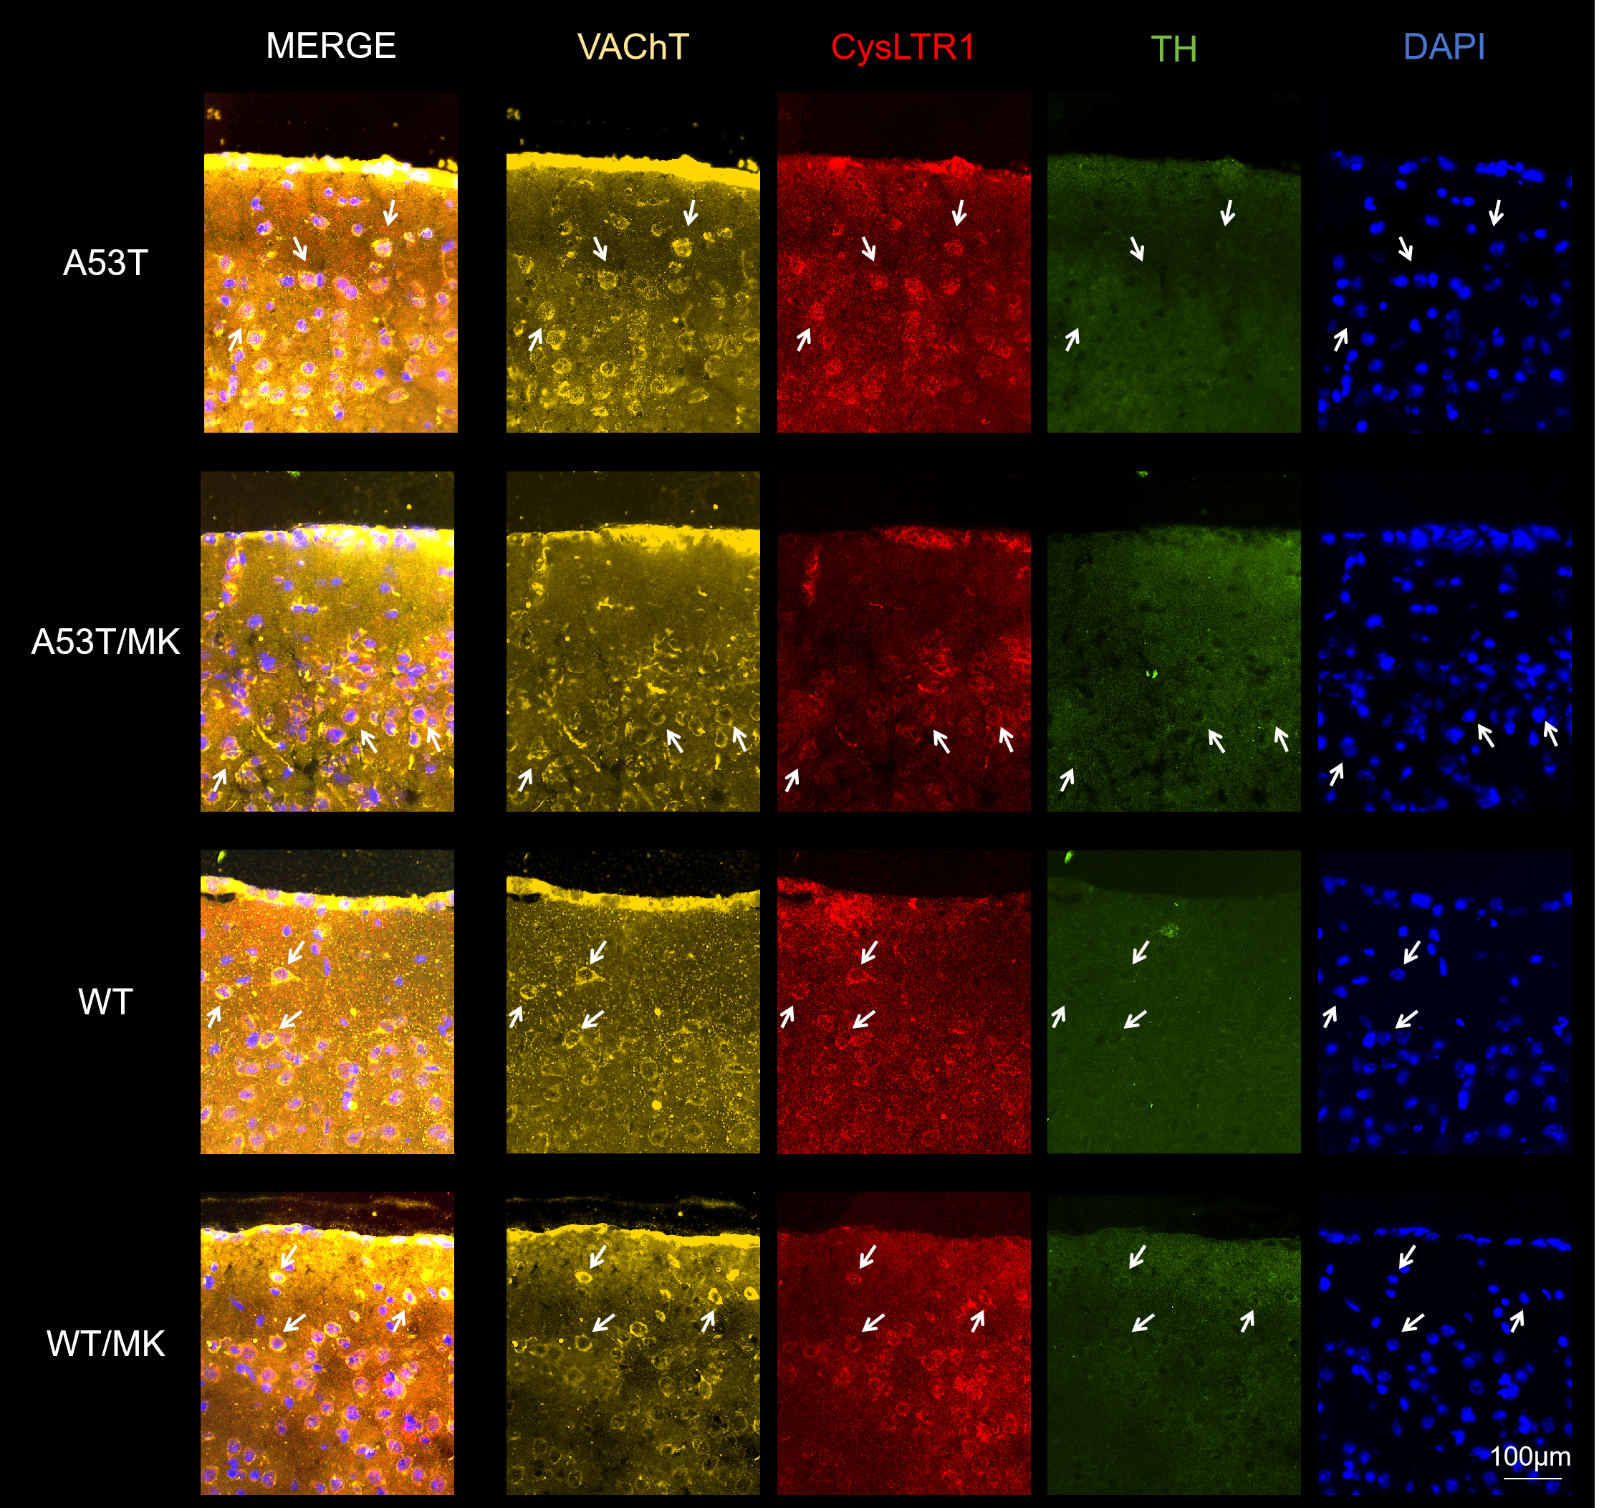


**Figure S1. Immunofluorescence staining of the cortex.** CysLTR1 was co-localized with VAChT but not TH. VAChT was highly expressed in the cortex of A53T mice. VAChT expression was reduced in A53T/MK mice compared to A53T mice.
